# Supplementary material for: Celastrol ameliorates lupus by promoting apoptosis of autoimmune T cells and preventing autoimmune response in MRL/lpr mice
Source: HighWire-hosted journal article supplement (doi:10.1136/lupus-2023-001057), 2024-03-01
Supplement: lupus-2023-001057supp002_data_supplement.pdf [file lupus-2023-001057supp002_data_supplement.pdf]

Supplementary Table S1 Details of the antibodies used for flow cytometry

| <b>Antibody</b>   | <b>lot number</b> | <b>Brand</b>                                |
|-------------------|-------------------|---------------------------------------------|
| Anti-CD16/CD32    | 14-0161-85        | eBioscience™; Thermo Fisher Scientific, Inc |
| Anti-CD3 PE-cy7   | 25-0032-82        | eBioscience™; Thermo Fisher Scientific, Inc |
| Anti-CD3 APC-cy7  | 47-0032-82        | eBioscience™; Thermo Fisher Scientific, Inc |
| Anti-CD4 FITC     | 53-0041-82        | eBioscience™; Thermo Fisher Scientific, Inc |
| Anti-CD8 PerCP    | 45-0081-82        | eBioscience™; Thermo Fisher Scientific, Inc |
| Anti-CD19 APC-cy7 | 47-0193-82        | eBioscience™; Thermo Fisher Scientific, Inc |
| Anti-CD19 PE-cy7  | 25-0193-82        | eBioscience™; Thermo Fisher Scientific, Inc |
| Anti-CD138 PE     | 142504            | BioLegend, Inc.                             |
| Anti-CD69 APC     | 17-0691-82        | eBioscience™; Thermo Fisher Scientific, Inc |
| Anti-CD25 APC     | 17-0251-82        | eBioscience™; Thermo Fisher Scientific, Inc |
| Anti-CD44 PE      | 12-0441-82        | eBioscience™; Thermo Fisher Scientific, Inc |
| Anti-CD62L APC    | 17-0621-82        | eBioscience™; Thermo Fisher Scientific, Inc |
| Anti-B220 PerCP   | 45-0452-82        | eBioscience™; Thermo Fisher Scientific, Inc |
| Anti-GL-7 APC     | 50-5902-82        | eBioscience™; Thermo Fisher Scientific, Inc |
| Anti-MHC-II FITC  | 11-5321-82        | eBioscience™; Thermo Fisher Scientific, Inc |
| Anti-CD23 APC     | 50-0232-82        | eBioscience™; Thermo Fisher Scientific, Inc |
| Anti-CD21 PE      | 12-0212-82        | eBioscience™; Thermo Fisher Scientific, Inc |
| Anti-CD69 PE      | 104508            | BioLegend, Inc                              |

---

|                           |             |                                             |
|---------------------------|-------------|---------------------------------------------|
| Anti-Foxp3 PE             | 12-5773-82  | eBioscience™; Thermo Fisher Scientific, Inc |
| Anti-IL-4 APC             | 17-7041-82  | eBioscience™; Thermo Fisher Scientific, Inc |
| Anti-IFN- $\gamma$ PE-cy7 | 25-7311-82  | eBioscience™; Thermo Fisher Scientific, Inc |
| Anti-TNF PE               | 12-7321-82  | eBioscience™; Thermo Fisher Scientific, Inc |
| Anti-Annexin V-FITC       | 35-6410 KIT | Tonbo Biosciences, Inc                      |
| Anti-7-AAD PerCP          | 35-6410 KIT | Tonbo Biosciences, Inc                      |

---
