# Supplementary figures and images for: Celastrol ameliorates lupus by promoting apoptosis of autoimmune T cells and preventing autoimmune response in MRL/lpr mice
Source: HighWire-hosted journal article supplement (doi:10.1136/lupus-2023-001057), 2024-03-01

A

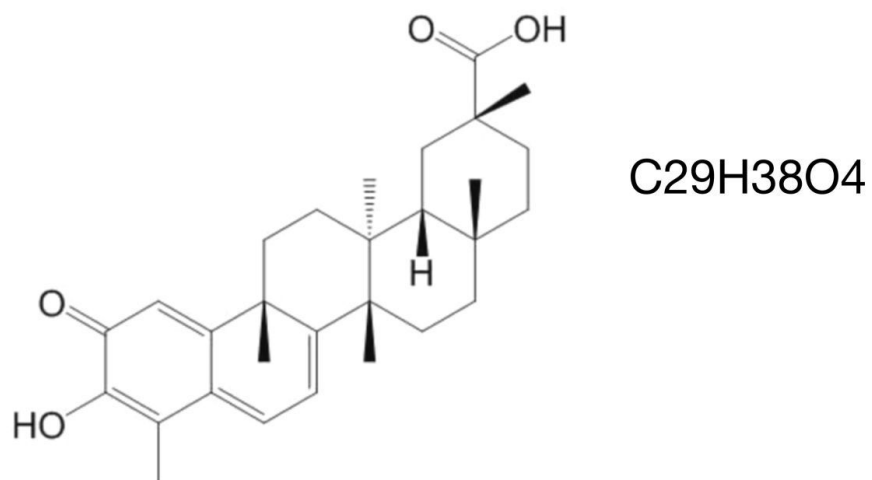

B

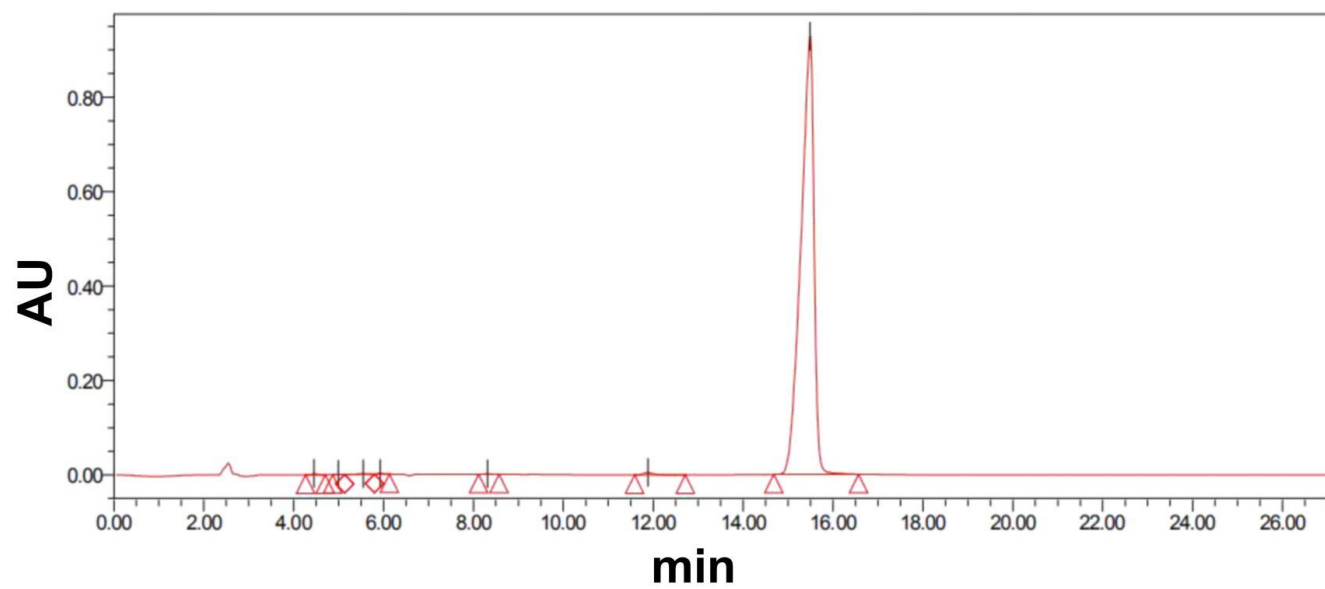

Supplement: lupus-2023-001057supp001_data_supplement.pdf [file lupus-2023-001057supp001_data_supplement.pdf]
